# Supplementary material for: Determining Pharmacological Mechanisms of Chinese Incompatible Herbs Fuzi and Banxia in Chronic Obstructive Pulmonary Disease: A Systems Pharmacology‐Based Study
Source: Hindawi journal article supplement (doi:10.1155/2020/8365603), 2020-01-01
Supplement: f1 [file 8365603.f1.zip]

## *Supplementary Material*

### **1 Supplementary Table**

Supplementary Table 1. Gene targets of Fuzi

| ID        | Name                     | Target                                      | Symbol |
|-----------|--------------------------|---------------------------------------------|--------|
| MOL002211 | 11,14-eicosadienoic acid | Nuclear receptor coactivator 2              | NCOA2  |
| MOL002388 | Delphin_qt               | Prostaglandin G/H synthase 1                | PTGS1  |
| MOL002388 | Delphin_qt               | Prostaglandin G/H synthase 2                | PTGS2  |
| MOL002388 | Delphin_qt               | Nuclear receptor coactivator 2              | NCOA2  |
| MOL002392 | Deltoin                  | Prostaglandin G/H synthase 1                | PTGS1  |
| MOL002392 | Deltoin                  | Sodium channel protein type 5 subunit alpha | SCN5A  |
| MOL002392 | Deltoin                  | Prostaglandin G/H synthase 2                | PTGS2  |
| MOL002392 | Deltoin                  | Acetylcholinesterase                        | ACHE   |
| MOL002392 | Deltoin                  | Alpha-1B adrenergic receptor                | ADRA1B |
| MOL002392 | Deltoin                  | Beta-2 adrenergic receptor                  | ADRB2  |
| MOL002392 | Deltoin                  | Trypsin-1                                   | PRSS1  |
| MOL002395 | Deoxyandrographolide     | Prostaglandin G/H synthase 2                | PTGS2  |
| MOL002395 | Deoxyandrographolide     | Progesterone receptor                       | PGR    |

# Supplementary Material

|           |                      |                                      |       |
|-----------|----------------------|--------------------------------------|-------|
| MOL002395 | Deoxyandrographolide | Nuclear receptor coactivator 2       | NCOA2 |
| MOL002395 | Deoxyandrographolide | Nuclear receptor coactivator 1       | NCOA1 |
| MOL002398 | Karanjin             | Prostaglandin G/H synthase 1         | PTGS1 |
| MOL002398 | Karanjin             | Estrogen receptor                    | ESR1  |
| MOL002398 | Karanjin             | Prostaglandin G/H synthase 2         | PTGS2 |
| MOL002398 | Karanjin             | Serine/threonine-protein kinase Chk1 | CHEK1 |
| MOL000359 | sitosterol           | Progesterone receptor                | PGR   |
| MOL000359 | sitosterol           | Nuclear receptor coactivator 2       | NCOA2 |
| MOL000359 | sitosterol           | Mineralocorticoid receptor           | NR3C2 |

Supplementary Table 2. Gene targets of Banxia

| ID        | Name            | Target                           | Symbol |
|-----------|-----------------|----------------------------------|--------|
| MOL000358 | beta-sitosterol | Serum paraoxonase/arylesterase 1 | PON1   |
| MOL000519 | coniferin       | Estrogen receptor                | ESR1   |
| MOL002714 | baicalein       | Androgen receptor                | AR     |
| MOL000519 | coniferin       | Androgen receptor                | AR     |

|           |                                                              |                                                  |       |
|-----------|--------------------------------------------------------------|--------------------------------------------------|-------|
| MOL006957 | (3S,6S)-3-(benzyl)-6-(4-hydroxybenzyl)piperazine-2,5-quinone | Androgen receptor                                | AR    |
| MOL002714 | baicalein                                                    | Cytochrome c                                     | CYCS  |
| MOL002714 | baicalein                                                    | Vascular endothelial growth factor A             | VEGFA |
| MOL002670 | cavidine                                                     | Prostaglandin G/H synthase 1                     | PTGS1 |
| MOL002714 | baicalein                                                    | Prostaglandin G/H synthase 1                     | PTGS1 |
| MOL000358 | beta-sitosterol                                              | Prostaglandin G/H synthase 1                     | PTGS1 |
| MOL000449 | stigmasterol                                                 | Prostaglandin G/H synthase 1                     | PTGS1 |
| MOL005030 | gondoic acid                                                 | Prostaglandin G/H synthase 1                     | PTGS1 |
| MOL006936 | 10,13-eicosadienoic                                          | Prostaglandin G/H synthase 1                     | PTGS1 |
| MOL000519 | coniferin                                                    | Peroxisome proliferator activated receptor gamma | PPARG |
| MOL002714 | baicalein                                                    | Apoptosis regulator Bcl-2                        | BCL2  |
| MOL000358 | beta-sitosterol                                              | Apoptosis regulator Bcl-2                        | BCL2  |
| MOL002670 | cavidine                                                     | Muscarinic acetylcholine receptor M5             | CHRM5 |
| MOL002714 | baicalein                                                    | Trypsin-1                                        | PRSS1 |
| MOL002670 | cavidine                                                     | 5-hydroxytryptamine receptor 3A                  | HTR3A |

# Supplementary Material

|           |                            |                                      |        |
|-----------|----------------------------|--------------------------------------|--------|
| MOL002670 | cavidine                   | Coagulation factor VII               | F7     |
| MOL002670 | cavidine                   | Alpha-2C adrenergic receptor         | ADRA2C |
| MOL002670 | cavidine                   | Muscarinic acetylcholine receptor M4 | CHRM4  |
| MOL000358 | beta-sitosterol            | Muscarinic acetylcholine receptor M4 | CHRM4  |
| MOL002670 | cavidine                   | Muscarinic acetylcholine receptor M3 | CHRM3  |
| MOL000358 | beta-sitosterol            | Muscarinic acetylcholine receptor M3 | CHRM3  |
| MOL000449 | stigmasterol               | Muscarinic acetylcholine receptor M3 | CHRM3  |
| MOL000519 | coniferin                  | Muscarinic acetylcholine receptor M3 | CHRM3  |
| MOL000358 | beta-sitosterol            | Alpha-1A adrenergic receptor         | ADRA1A |
| MOL000449 | stigmasterol               | Alpha-1A adrenergic receptor         | ADRA1A |
| MOL002714 | baicalein                  | Cellular tumor antigen p53           | TP63   |
| MOL000449 | stigmasterol               | Chymotrypsinogen B                   | CTRB1  |
| MOL001755 | 24-ethylcholest-4-en-3-one | Progesterone receptor                | PGR    |
| MOL000358 | beta-sitosterol            | Progesterone receptor                | PGR    |

|           |                            |                                                                 |        |
|-----------|----------------------------|-----------------------------------------------------------------|--------|
| MOL000449 | stigmasterol               | Progesterone receptor                                           | PGR    |
| MOL000358 | beta-sitosterol            | Muscarinic acetylcholine receptor M2                            | CHRM2  |
| MOL000449 | stigmasterol               | Muscarinic acetylcholine receptor M2                            | CHRM2  |
| MOL002714 | baicalein                  | Aryl hydrocarbon receptor                                       | AHR    |
| MOL002714 | baicalein                  | Nuclear receptor coactivator 1                                  | NCOA1  |
| MOL000449 | stigmasterol               | Nuclear receptor coactivator 1                                  | NCOA1  |
| MOL000519 | coniferin                  | Nuclear receptor coactivator 1                                  | NCOA1  |
| MOL002714 | baicalein                  | Nuclear receptor coactivator 2                                  | NCOA2  |
| MOL000358 | beta-sitosterol            | Nuclear receptor coactivator 2                                  | NCOA2  |
| MOL000449 | stigmasterol               | Nuclear receptor coactivator 2                                  | NCOA2  |
| MOL005030 | gondoic acid               | Nuclear receptor coactivator 2                                  | NCOA2  |
| MOL000519 | coniferin                  | Nuclear receptor coactivator 2                                  | NCOA2  |
| MOL006936 | 10,13-eicosadienoic        | Nuclear receptor coactivator 2                                  | NCOA2  |
| MOL002670 | cavidine                   | cAMP and cAMP-inhibited cGMP 3',5'-cyclic phosphodiesterase 10A | PDE10A |
| MOL001755 | 24-ethylcholest-4-en-3-one | Mineralocorticoid receptor                                      | NR3C2  |

# Supplementary Material

|           |                 |                                                  |        |
|-----------|-----------------|--------------------------------------------------|--------|
| MOL000449 | Stigmasterol    | Mineralocorticoid receptor                       | NR3C2  |
| MOL003578 | Cycloartenol    | Mineralocorticoid receptor                       | NR3C2  |
| MOL000358 | beta-sitosterol | Neuronal acetylcholine receptor subunit alpha-2  | CHRNA2 |
| MOL000449 | stigmasterol    | Aldose reductase                                 | AKR1B1 |
| MOL000358 | beta-sitosterol | Gamma-aminobutyric acid receptor subunit alpha-1 | GABRA1 |
| MOL000449 | stigmasterol    | Gamma-aminobutyric acid receptor subunit alpha-1 | GABRA1 |
| MOL002670 | cavidine        | Retinoic acid receptor RXR-beta                  | RXRB   |
| MOL002714 | baicalein       | Transcription factor p65                         | RELA   |
| MOL002714 | baicalein       | Proto-oncogene c-Fos                             | FOS    |
| MOL002714 | baicalein       | Caspase-3                                        | CASP3  |
| MOL002714 | baicalein       | Hypoxia-inducible factor 1-alpha                 | HIF1A  |
| MOL002714 | baicalein       | Fos-related antigen 1                            | FOSL1  |
| MOL002714 | baicalein       | G2/mitotic-specific cyclin-B1                    | CCNB1  |
| MOL002714 | baicalein       | Insulin-like growth factor II                    | IGF2   |
| MOL002714 | baicalein       | NADPH oxidase 5                                  | NOX5   |

|           |                 |                             |       |
|-----------|-----------------|-----------------------------|-------|
| MOL002714 | baicalein       | Apolipoprotein D            | APOD  |
| MOL000358 | beta-sitosterol | Caspase-9                   | CASP9 |
| MOL000358 | beta-sitosterol | Caspase-3                   | CASP3 |
| MOL000358 | beta-sitosterol | Caspase-8                   | CASP8 |
| MOL000358 | beta-sitosterol | Protein kinase C alpha type | PRKCA |

Supplementary Table 3. Number of targets corresponding to different components

| Source | MolName                                                      | count |
|--------|--------------------------------------------------------------|-------|
| Banxia | baicalein                                                    | 19    |
| Banxia | beta-sitosterol                                              | 15    |
| Banxia | Stigmasterol                                                 | 11    |
| Banxia | Cavidine                                                     | 9     |
| Banxia | coniferin                                                    | 6     |
| Banxia | gondoic acid                                                 | 2     |
| Banxia | 10,13-eicosadienoic                                          | 2     |
| Banxia | 24-Ethylcholest-4-en-3-one                                   | 2     |
| Banxia | (3S,6S)-3-(benzyl)-6-(4-hydroxybenzyl)piperazine-2,5-quinone | 1     |

Supplementary Material

|        |                          |   |
|--------|--------------------------|---|
| Banxia | Cycloartenol             | 1 |
| Fuzi   | Deltoin                  | 7 |
| Fuzi   | Deoxyandrographolide     | 4 |
| Fuzi   | Karanjin                 | 4 |
| Fuzi   | Delphin_qt               | 3 |
| Fuzi   | sitosterol               | 3 |
| Fuzi   | 11,14-eicosadienoic acid | 1 |

Supplementary Table 4. The data of GO enrichment analysis

| ID         | Description                                                                          | BgRatio   | pvalue      | p-adjust    | qvalue        | geneID            | Count |
|------------|--------------------------------------------------------------------------------------|-----------|-------------|-------------|---------------|-------------------|-------|
| GO:0033613 | transcription factor-binding                                                         | 64/16969  | 1.77E-06    | 0.00017363  | 5.78E-05      | 2353/5468/5970    | 3     |
| GO:0046982 | protein heterodimerization-activity                                                  | 497/16969 | 2.37E-05    | 0.001162372 | 0.00038704122 | 2353/5468/5970/74 | 4     |
| GO:0042805 | actinin-binding                                                                      | 29/16969  | 5.89E-05    | 0.001924371 | 0.000640768   | 5468/5970         | 2     |
| GO:0004879 | nuclear-receptor activity                                                            | 46/16969  | 0.000149674 | 0.002933612 | 0.00097682    | 5468/5241         | 2     |
| GO:0098531 | transcription factor activity, direct ligand regulated sequence-specific-DNA binding | 46/16969  | 0.000149674 | 0.002933612 | 0.00097682    | 5468/5241         | 2     |
| GO:0003707 | steroid hormone receptor activity                                                    | 54/16969  | 0.000206615 | 0.003374718 | 0.001123698   | 5468/5241         | 2     |
| GO:0001228 | DNA-binding transcription activator                                                  | 390/16969 | 0.000393637 | 0.005510923 | 0.001835001   | 2353/5970/5241    | 3     |

批注 [倪1]: Dear editors, to show the tables clearly, we insert the link instead of the tables.



|            |                                                                     |           |             |             |             |                |    |
|------------|---------------------------------------------------------------------|-----------|-------------|-------------|-------------|----------------|----|
|            | activity, RNA polymerase II-specific                                |           |             |             |             |                |    |
|            | RNA polymerase II proximal promoter sequence-specific DNA binding   |           |             |             |             |                |    |
| GO:0000978 |                                                                     | 432/16969 | 0.000531383 | 0.005945268 | 0.001979627 | 5468/5970/5241 | \$ |
| GO:0003682 | chromatin binding                                                   | 437/16969 | 0.000549598 | 0.005945268 | 0.001979627 | 2353/5468/5970 | \$ |
| GO:0000987 | proximal promoter sequence-specific DNA binding                     | 452/16969 | 0.00060666  | 0.005945268 | 0.001979627 | 5468/5970/5241 | \$ |
| GO:0005126 | cytokine receptor-binding                                           | 210/16969 | 0.00307269  | 0.027374547 | 0.009115048 | 836/7422       | 2  |
| GO:0005172 | vascular endothelial growth factor receptor-binding                 | 11/16969  | 0.004529671 | 0.02971968  | 0.009895919 | 7422           | +  |
| GO:0016004 | phospholipase activator-activity                                    | 11/16969  | 0.004529671 | 0.02971968  | 0.009895919 | 836            | +  |
| GO:0004861 | cyclin-dependent protein serine/threonine kinase-inhibitor activity | 12/16969  | 0.004940585 | 0.02971968  | 0.009895919 | 836            | +  |
| GO:0004953 | icosanoid receptor-activity                                         | 12/16969  | 0.004940585 | 0.02971968  | 0.009895919 | 5468           | +  |
| GO:0042301 | phosphate-ion binding                                               | 12/16969  | 0.004940585 | 0.02971968  | 0.009895919 | 5970           | +  |
| GO:0060229 | lipase-activator activity                                           | 13/16969  | 0.005351355 | 0.02971968  | 0.009895919 | 836            | +  |
| GO:0005161 | platelet-derived growth factor receptor-binding                     | 14/16969  | 0.005761979 | 0.02971968  | 0.009895919 | 7422           | +  |
| GO:0036041 | long-chain fatty acid-binding                                       | 14/16969  | 0.005761979 | 0.02971968  | 0.009895919 | 5468           | +  |
| GO:0046965 | retinoid-X receptor-binding                                         | 15/16969  | 0.006172457 | 0.030245042 | 0.010070852 | 5468           | +  |
| GO:0005123 | death-receptor binding                                              | 17/16969  | 0.006992979 | 0.031171061 | 0.010379193 | 836            | +  |

# Supplementary Material

|            |                                                                     |          |             |             |             |      |   |
|------------|---------------------------------------------------------------------|----------|-------------|-------------|-------------|------|---|
| GO:0016538 | cyclin-dependent protein serine/threonine kinase-regulator activity | 18/16969 | 0.007403022 | 0.031171061 | 0.010379193 | 836  | 1 |
| GO:0004190 | aspartic-type endopeptidase activity                                | 20/16969 | 0.008222673 | 0.031171061 | 0.010379193 | 836  | 1 |
| GO:0000979 | RNA polymerase-II core-promoter sequence-specific-DNA binding       | 21/16969 | 0.00863228  | 0.031171061 | 0.010379193 | 2353 | 1 |
| GO:0001223 | transcription coactivator binding                                   | 21/16969 | 0.00863228  | 0.031171061 | 0.010379193 | 5970 | 1 |
| GO:0051393 | alpha-actinin binding                                               | 21/16969 | 0.00863228  | 0.031171061 | 0.010379193 | 5468 | 1 |
| GO:0070001 | aspartic-type peptidase activity                                    | 22/16969 | 0.009041743 | 0.031171061 | 0.010379193 | 836  | 1 |
| GO:0070412 | R-SMAD binding                                                      | 23/16969 | 0.009451061 | 0.031171061 | 0.010379193 | 2353 | 1 |
| GO:1901567 | fatty-acid derivative binding                                       | 23/16969 | 0.009451061 | 0.031171061 | 0.010379193 | 5468 | 1 |
| GO:0001968 | fibronectin binding                                                 | 24/16969 | 0.009860234 | 0.031171061 | 0.010379193 | 7422 | 1 |
| GO:0042974 | retinoic-acid receptor-binding                                      | 24/16969 | 0.009860234 | 0.031171061 | 0.010379193 | 5468 | 1 |
| GO:0005504 | fatty-acid binding                                                  | 28/16969 | 0.011495477 | 0.034311314 | 0.01142482  | 5468 | 1 |
| GO:0042056 | chemoattractant activity                                            | 29/16969 | 0.011903925 | 0.034311314 | 0.01142482  | 7422 | 1 |
| GO:0051059 | NF-kappaB binding                                                   | 29/16969 | 0.011903925 | 0.034311314 | 0.01142482  | 5970 | 1 |
| GO:0030291 | protein serine/threonine kinase-inhibitor activity                  | 30/16969 | 0.01231223  | 0.034474243 | 0.011479071 | 836  | 1 |
| GO:0001046 | core-promoter sequence-                                             | 32/16969 | 0.013128404 | 0.035738433 | 0.011900015 | 2353 | 1 |

|            |                                                                |          |                 |                 |                 |       |   |
|------------|----------------------------------------------------------------|----------|-----------------|-----------------|-----------------|-------|---|
|            | specific-DNA<br>binding                                        |          |                 |                 |                 |       |   |
|            | RNA                                                            |          |                 |                 |                 |       |   |
| GO:0001102 | polymerase-II<br>activating<br>transcription<br>factor-binding | 37/16969 | 0.0151663<br>12 | 0.0401631<br>34 | 0.0133733<br>31 | 2353  | + |
| GO:0001221 | transcription<br>cofactor-binding                              | 38/16969 | 0.0155734<br>6  | 0.0401631<br>34 | 0.0133733<br>31 | 5970  | + |
| GO:0030331 | estrogen<br>receptor-binding                                   | 41/16969 | 0.0167940<br>39 | 0.0419792<br>36 | 0.0139780<br>49 | 5468  | + |
| GO:0001047 | core-promoter<br>binding                                       | 42/16969 | 0.0172006<br>11 | 0.0419792<br>36 | 0.0139780<br>49 | 2353  | + |
| GO:0050840 | extracellular<br>matrix-binding                                | 43/16969 | 0.0176070<br>38 | 0.0419792<br>36 | 0.0139780<br>49 | 7422  | + |
| GO:0030374 | nuclear-receptor<br>transcription<br>coactivator<br>activity   | 45/16969 | 0.0184194<br>61 | 0.0419792<br>36 | 0.0139780<br>49 | 5468  | + |
| GO:0032813 | tumor-necrosis<br>factor-receptor<br>superfamily<br>binding    | 45/16969 | 0.0184194<br>61 | 0.0419792<br>36 | 0.0139780<br>49 | 836   | + |
| GO:0004722 | protein<br>serine/threonine<br>phosphatase<br>activity         | 49/16969 | 0.0200425<br>78 | 0.0436482<br>82 | 0.0145337<br>99 | 54205 | + |
| GO:0070888 | E-box-binding                                                  | 49/16969 | 0.0200425<br>78 | 0.0436482<br>82 | 0.0145337<br>99 | 5468  | + |
| GO:0004197 | cysteine-type<br>endopeptidase<br>activity                     | 56/16969 | 0.0228774<br>99 | 0.0477020<br>19 | 0.0158835<br>94 | 836   | + |
| GO:0043621 | protein-self-<br>association                                   | 56/16969 | 0.0228774<br>99 | 0.0477020<br>19 | 0.0158835<br>94 | 5468  | + |
| GO:0033293 | monocarboxylic<br>acid-binding                                 | 59/16969 | 0.0240903<br>11 | 0.0480088<br>18 | 0.0159857<br>5  | 5468  | + |
| GO:0070491 | repressing<br>transcription<br>factor-binding                  | 59/16969 | 0.0240903<br>11 | 0.0480088<br>18 | 0.0159857<br>5  | 5970  | + |
| GO:0004860 | protein-kinase<br>inhibitor-activity                           | 60/16969 | 0.0244942<br>95 | 0.0480088<br>18 | 0.0159857<br>5  | 836   | + |

[GO..xlsx](#)

Supplementary Table 5. The data of KEGG enrichment analysis

Supplementary Material

| ID       | Description                                     | Background | pvalue   | p-adjust | qvalue   | geneID                                                                 | Count |
|----------|-------------------------------------------------|------------|----------|----------|----------|------------------------------------------------------------------------|-------|
| hsa04115 | p53 signaling pathway                           | 72/8016    | 7.36E-08 | 5.42E-06 | 2.9E-06  | BCL2/CASP8/CASP3/CYCS/CASP9/CHEK1/CCNB1                                | 7     |
| hsa04725 | Cholinergic synapse                             | 112/8016   | 8.98E-08 | 5.42E-06 | 2.9E-06  | BCL2/CHRM3/FOS/ACHE/PRKCA/CHRM2/CHRM4/CHRM5                            | 8     |
| hsa05170 | Human immunodeficiency virus-1 infection        | 212/8016   | 9.51E-08 | 5.42E-06 | 2.9E-06  | BCL2/CASP8/RELA/CASP3/CYCS/CASP9/FOS/CH                                | 10    |
| hsa05167 | Kaposi sarcoma-associated herpesvirus infection | 186/8016   | 3.7E-07  | 1.39E-05 | 7.42E-06 | VEGFA/CASP8/PTGS2/RELA/CASP3/HIF1A/CYCS/CASP9/FOS                      | 9     |
| hsa05222 | Small cell lung cancer                          | 92/8016    | 4.05E-07 | 1.39E-05 | 7.42E-06 | BCL2/PTGS2/RELA/CASP3/CYCS/CASP9/RXR                                   | 7     |
| hsa04215 | Apoptosis - multiple species                    | 32/8016    | 5.6E-07  | 1.6E-05  | 8.55E-06 | BCL2/CASP8/CASP3/CYCS/CASP9                                            | 5     |
| hsa04080 | Neuroactive ligand-receptor interaction         | 340/8016   | 8.92E-07 | 2.18E-05 | 1.17E-05 | ADRB2/CHRM3/PRSS1/ADRA1B/CHRM2/ADRA1A/GABRA1/ADRA2C/CHRNA2/CHRM4/CHRM5 | 11    |
| hsa05161 | Hepatitis B                                     | 162/8016   | 1.54E-06 | 3.29E-05 | 1.76E-05 | BCL2/CASP8/RELA/CASP3/CYCS/CASP9/FOS/PRKCA                             | 8     |
| hsa04919 | Thyroid hormone signaling pathway               | 119/8016   | 2.34E-06 | 4.44E-05 | 2.38E-05 | ESR1/HIF1A/CASP9/PRKCA/RXR/NCOA1/NCOA2                                 | 7     |
| hsa04210 | Apoptosis                                       | 136/8016   | 5.7E-06  | 9.74E-05 | 5.22E-05 | BCL2/CASP8/RELA/CASP3/CYCS/CASP9/FOS                                   | 7     |
| hsa05162 | Measles                                         | 138/8016   | 6.28E-06 | 9.76E-05 | 5.23E-05 | BCL2/CASP8/RELA/CASP3/CYCS/CASP9/FOS                                   | 7     |

|          |                                                      |          |             |             |             |                                               |   |
|----------|------------------------------------------------------|----------|-------------|-------------|-------------|-----------------------------------------------|---|
| hsa04657 | IL-17 signaling pathway                              | 94/8016  | 8.27E-06    | 0.000117783 | 6.31E-05    | CASP8/PTGS2/RELA/CASP3/FOS/FOSL1              | 6 |
| hsa05134 | Legionellosis                                        | 57/8016  | 1.06E-05    | 0.000139183 | 7.45E-05    | CASP8/RELA/CASP3/CYCS/CASP9                   | 5 |
| hsa05163 | Human cytomegalovirus infection                      | 225/8016 | 1.76E-05    | 0.000215165 | 0.000115231 | VEGFA/CASP8/PTGS2/RELA/CASP3/CYCS/CASP9/PRKCA | 8 |
| hsa05145 | Toxoplasmosis                                        | 112/8016 | 2.27E-05    | 0.00025824  | 0.0001383   | BCL2/CASP8/RELA/CASP3/CYCS/CASP9              | 6 |
| hsa05164 | Influenza A                                          | 170/8016 | 2.46E-05    | 0.000262954 | 0.000140825 | CASP8/RELA/CASP3/PRSS1/CYCS/CASP9/PRKCA       | 7 |
| hsa01524 | Platinum drug resistance                             | 73/8016  | 3.57E-05    | 0.000358972 | 0.000192247 | BCL2/CASP8/CASP3/CYCS/CASP9                   | 5 |
| hsa04020 | Calcium signaling pathway                            | 193/8016 | 5.56E-05    | 0.000527798 | 0.000282662 | ADRB2/CHRM3/PRKCA/ADRA1B/CHRM2/ADRA1A/CHRM5   | 7 |
| hsa04915 | Estrogen signaling pathway                           | 138/8016 | 7.36E-05    | 0.000662091 | 0.000354582 | BCL2/ESR1/FOS/PGR/NCOA1/NCOA2                 | 6 |
| hsa05210 | Colorectal cancer                                    | 86/8016  | 7.87E-05    | 0.000672897 | 0.00036037  | BCL2/CASP3/CYCS/CASP9/FOS                     | 5 |
| hsa04970 | Salivary gland secretory pathway                     | 90/8016  | 9.78E-05    | 0.00079636  | 0.00042649  | ADRB2/CHRM3/PRKCA/ADRA1B/ADRA1A               | 5 |
| hsa04261 | Adrenergic signaling in cardiomyocytes               | 149/8016 | 0.000112616 | 0.000875333 | 0.000468783 | BCL2/ADRB2/SCN5A/PRKCA/ADRA1B/ADRA1A          | 6 |
| hsa04933 | AGE-RAGE signaling pathway in diabetic complications | 100/8016 | 0.000161202 | 0.000198501 | 0.000641857 | VEGFA/BCL2/RELA/CASP3/PRKCA                   | 5 |

# Supplementary Material

|           |            |      |       |       |       |                                   |
|-----------|------------|------|-------|-------|-------|-----------------------------------|
| Amyotro   |            |      |       |       |       |                                   |
| hsa0      | phic       | 57/8 | 0.000 | 0.001 | 0.000 |                                   |
| 5014      | lateral    | 016  | 21032 | 49856 | 80255 | BCL2/CASP3/CYCS/CASP9             |
|           | sclerosis  |      | 5     | 4     | 5     |                                   |
| (ALS)     |            |      |       |       |       |                                   |
| hsa0      | Th17-cell  | 107/ | 0.000 | 0.001 | 0.000 |                                   |
| 4659      | differenti | 801  | 22156 | 51551 | 81163 | RELA/HIF1A/FOS/AHR/RXR            |
|           | ation      | 6    | 6     | 2     | 2     |                                   |
| hsa0      | VEGF       | 59/8 | 0.000 | 0.001 | 0.000 |                                   |
| 4370      | signaling  | 016  | 24050 | 53027 | 81953 | VEGFA/PTGS2/CASP9/PRKCA           |
|           | pathway    |      | 4     | 4     | 7     |                                   |
| hsa0      | HIF-1      | 109/ | 0.000 | 0.001 | 0.000 |                                   |
| 4066      | signaling  | 801  | 24162 | 53027 | 81953 | VEGFA/BCL2/RELA/HIF1A/PRKCA       |
|           | pathway    | 6    | 2     | 4     | 7     |                                   |
| hsa0      | Viral      | 60/8 | 0.000 | 0.001 | 0.000 |                                   |
| 5416      | myocardi   | 016  | 25670 | 56775 | 83961 | CASP8/CASP3/CYCS/CASP9            |
|           | tis        |      | 9     | 6     | 1     |                                   |
| hsa0      | TNF        | 112/ | 0.000 | 0.001 | 0.000 |                                   |
| 4668      | signaling  | 801  | 27426 | 61722 | 86610 | CASP8/PTGS2/RELA/CASP3/FOS        |
|           | pathway    | 6    | 6     | 7     | 5     |                                   |
| hsa0      | Serotoner  | 115/ | 0.000 | 0.001 | 0.000 |                                   |
| 4726      | gie        | 801  | 31016 | 74305 | 93349 | PTGS2/CASP3/PTGS1/HTR3A/PRKCA     |
|           | synapse    | 6    | 5     | 1     |       |                                   |
| hsa0      | Tubereul   | 180/ | 0.000 | 0.001 | 0.000 |                                   |
| 5152      | osis       | 801  | 31599 | 74305 | 93349 | BCL2/CASP8/RELA/CASP3/CYCS/CASP9  |
|           |            | 6    | 2     | 1     |       |                                   |
| hsa0      | Epstein-   | 201/ | 0.000 | 0.003 | 0.001 |                                   |
| 5169      | Barr       | 801  | 0.000 | 03132 | 62342 | BCL2/CASP8/RELA/CASP3/CYCS/CASP9  |
|           | virus      | 6    | 56982 | 4     | 4     |                                   |
| infection |            |      |       |       |       |                                   |
| Pathogen  |            |      |       |       |       |                                   |
| hsa0      | ie         | 202/ | 0.000 | 0.003 | 0.001 |                                   |
| 5130      | Escherie   | 801  | 58499 | 03132 | 62342 | CASP8/RELA/CASP3/CYCS/CASP9/FOS   |
|           | hia-coli   | 6    | 2     | 4     | 4     |                                   |
| infection |            |      |       |       |       |                                   |
| hsa0      | Proteogly  | 204/ | 0.000 | 0.003 | 0.001 |                                   |
| 5205      | cans-in    | 801  | 61628 | 09953 | 65995 | VEGFA/ESR1/IGF2/CASP3/HIF1A/PRKCA |
|           | cancer     | 6    | 2     | 5     | 4     |                                   |
| hsa0      | Salmonel   | 214/ | 0.000 | 0.003 | 0.002 |                                   |
| 5132      | la         | 801  | 79281 | 87345 | 07442 | BCL2/CASP8/RELA/CASP3/CYCS/FOS    |
|           | infection  | 6    | 2     | 4     | 6     |                                   |
| hsa0      | Hepatitis  | 155/ | 0.001 | 0.005 | 0.003 |                                   |
| 5160      | C          | 801  | 21017 | 74832 | 07851 | CASP8/RELA/CASP3/CYCS/CASP9       |
|           |            | 6    | 4     | 7     | 3     |                                   |

|          |                                             |          |            |            |            |                                        |   |
|----------|---------------------------------------------|----------|------------|------------|------------|----------------------------------------|---|
| hsa05215 | Prostate cancer                             | 97/8016  | 0.00158571 | 0.00732855 | 0.00392480 | BCL2/RELA/AR/CASP9                     | 4 |
| hsa04151 | PI3K-Akt signaling pathway                  | 354/8016 | 0.00218713 | 0.0096352  | 0.00516012 | VEGFA/BCL2/IGF2/RELA/CASP9/PRKCA/CHRM2 | 7 |
| hsa04928 | Parathyroid hormone synthesis and secretion | 106/8016 | 0.00219750 | 0.0096352  | 0.00516012 | BCL2/FOS/PRKCA/RXR                     | 4 |
| hsa04923 | Regulation of lipolysis in adipocytes       | 55/8016  | 0.00290397 | 0.01241447 | 0.00664856 | ADRB2/PTGS2/PTGS1                      | 3 |
| hsa04010 | MAPK signaling pathway                      | 295/8016 | 0.00405268 | 0.01690268 | 0.00905222 | VEGFA/IGF2/RELA/CASP3/FOS/PRKCA        | 6 |
| hsa04380 | Osteoclast differentiation                  | 128/8016 | 0.00434316 | 0.01768288 | 0.00947005 | PPARG/RELA/FOS/FOSL1                   | 4 |
| hsa04926 | Relaxin signaling pathway                   | 129/8016 | 0.00446528 | 0.01775728 | 0.00950990 | VEGFA/RELA/FOS/PRKCA                   | 4 |
| hsa05223 | Non-small-cell lung cancer                  | 66/8016  | 0.00486720 | 0.01891571 | 0.01013030 | CASP9/PRKCA/RXR                        | 3 |
| hsa05206 | MicroRNA-As in cancer                       | 310/8016 | 0.00516188 | 0.01961514 | 0.01050488 | VEGFA/BCL2/TP63/PTGS2/CASP3/PRKCA      | 6 |
| hsa04917 | Prolactin signaling pathway                 | 70/8016  | 0.00573863 | 0.02116224 | 0.01133342 | ESR1/RELA/FOS                          | 3 |
| hsa05418 | Fluid shear stress and atherosclerosis      | 139/8016 | 0.00581652 | 0.02116224 | 0.01133342 | VEGFA/BCL2/RELA/FOS                    | 4 |

# Supplementary Material

|                                                                               |                  |                     |                     |                     |                              |   |
|-------------------------------------------------------------------------------|------------------|---------------------|---------------------|---------------------|------------------------------|---|
| hsa0 Breast<br>5224 cancer                                                    | 147/<br>801<br>6 | 0.007<br>07666<br>8 | 0.024<br>58749<br>4 | 0.013<br>16781<br>8 | ESR1/FOS/PGR/NCOA1           | 4 |
| hsa0 Pertussis<br>5133                                                        | 76/<br>016       | 0.007<br>21161<br>7 | 0.024<br>58749<br>4 | 0.013<br>16781<br>8 | RELA/CASP3/FOS               | 3 |
| hsa0 Pancreati<br>5212 e-cancer                                               | 76/<br>016       | 0.007<br>21161<br>7 | 0.024<br>58749<br>4 | 0.013<br>16781<br>8 | VEGFA/RELA/CASP9             | 3 |
| Non-<br>alcoholic<br>hsa0 fatty liver<br>4932 disease<br>(NAFLD<br>)          | 149/<br>801<br>6 | 0.007<br>41783<br>6 | 0.024<br>58749<br>4 | 0.013<br>16781<br>8 | CASP8/RELA/CASP3/CYCS        | 4 |
| hsa0 Leishma<br>5140 niasis                                                   | 77/<br>016       | 0.007<br>47689<br>9 | 0.024<br>58749<br>4 | 0.013<br>16781<br>8 | PTGS2/RELA/FOS               | 3 |
| EGFR<br>tyrosine<br>hsa0 kinase<br>1521 inhibitor<br>resistanc<br>e           | 79/<br>016       | 0.008<br>02470<br>1 | 0.025<br>89101<br>5 | 0.013<br>86591<br>7 | VEGFA/BCL2/PRKCA             | 3 |
| hsa0 Taste<br>4742 transduct<br>ion                                           | 83/<br>016       | 0.009<br>19004<br>4 | 0.029<br>10180<br>4 | 0.015<br>58545<br>4 | CHRM3/HTR3A/GABRA1           | 3 |
| eGMP-<br>hsa0 PKG<br>4022 signaling<br>pathway<br>PD-L1<br>expressio<br>n-and | 167/<br>801<br>6 | 0.010<br>98790<br>8 | 0.033<br>94180<br>8 | 0.018<br>17751<br>5 | ADRB2/ADRA1B/ADRA1A/ADRA2C   | 4 |
| hsa0 PD-1<br>5235 checkpoi<br>nt<br>pathway<br>in-cancer                      | 89/<br>016       | 0.011<br>11544<br>6 | 0.033<br>94180<br>8 | 0.018<br>17751<br>5 | RELA/HIF1A/FOS               | 3 |
| hsa0 Huntingt<br>5016 on<br>disease                                           | 264/<br>801<br>6 | 0.011<br>72373<br>6 | 0.035<br>11119<br>7 | 0.018<br>80378<br>1 | PPARG/CASP8/CASP3/CYCS/CASP9 | 5 |
| hsa0 Alzheim<br>5010 r-disease                                                | 171/<br>801<br>6 | 0.011<br>90906<br>1 | 0.035<br>11119<br>7 | 0.018<br>80378<br>1 | CASP8/CASP3/CYCS/CASP9       | 4 |



|                                   |          |            |            |            |                   |   |  |
|-----------------------------------|----------|------------|------------|------------|-------------------|---|--|
| Endocrin                          |          |            |            |            |                   |   |  |
| hsa01522                          | 98/8016  | 0.01441165 | 0.04107322 | 0.02199673 | BCL2/ESR1/FOS     | 3 |  |
| resistance                        |          | 7          | 2          | 9          |                   |   |  |
| Choline                           |          |            |            |            |                   |   |  |
| hsa05231                          | 98/8016  | 0.01441165 | 0.04107322 | 0.02199673 | HIF1A/FOS/PRKCA   | 3 |  |
| metabolism in cancer              |          | 7          | 2          | 9          |                   |   |  |
| Aldosterone-                      |          |            |            |            |                   |   |  |
| hsa04960                          | 37/8016  | 0.01589521 | 0.04154927 | 0.02225169 | NR3C2/PRKCA       | 2 |  |
| regulated sodium reabsorption     |          |            | 9          | 1          |                   |   |  |
| Thyroid                           |          |            |            |            |                   |   |  |
| hsa05216                          | 37/8016  | 0.01589521 | 0.04154927 | 0.02225169 | PPARG/RXR         | 2 |  |
| cancer                            |          |            | 9          | 1          |                   |   |  |
| NF-kappa-B                        |          |            |            |            |                   |   |  |
| hsa04064                          | 102/8016 | 0.01603656 | 0.04154927 | 0.02225169 | BCL2/PTGS2/RELA   | 3 |  |
| signaling pathway                 |          | 6          | 4          | 9          | 1                 |   |  |
| Pancreatic                        |          |            |            |            |                   |   |  |
| hsa04972                          | 102/8016 | 0.01603656 | 0.04154927 | 0.02225169 | CHRM3/PRSS1/PRKCA | 3 |  |
| secretion                         |          | 6          | 4          | 9          | 1                 |   |  |
| Chagas disease                    |          |            |            |            |                   |   |  |
| hsa05142                          | 102/8016 | 0.01603656 | 0.04154927 | 0.02225169 | CASP8/RELA/FOS    | 3 |  |
| (American trypanosomiasis)        |          | 6          | 4          | 9          | 1                 |   |  |
| Amoebiasis                        |          |            |            |            |                   |   |  |
| hsa05146                          | 102/8016 | 0.01603656 | 0.04154927 | 0.02225169 | RELA/CASP3/PRKCA  | 3 |  |
|                                   |          | 6          | 4          | 9          | 1                 |   |  |
| Toll-like                         |          |            |            |            |                   |   |  |
| hsa04620                          | 104/8016 | 0.01688630 | 0.04246409 | 0.02274161 | CASP8/RELA/FOS    | 3 |  |
| receptor signaling pathway        |          | 6          | 5          |            | 8                 |   |  |
| C-type                            |          |            |            |            |                   |   |  |
| hsa04625                          | 104/8016 | 0.01688630 | 0.04246409 | 0.02274161 | CASP8/PTGS2/RELA  | 3 |  |
| lectin receptor signaling pathway |          | 6          | 5          |            | 8                 |   |  |
| <a href="#">KEGG.xlsx</a>         |          |            |            |            |                   |   |  |
