# Supplementary material for: Determining Pharmacological Mechanisms of Chinese Incompatible Herbs Fuzi and Banxia in Chronic Obstructive Pulmonary Disease: A Systems Pharmacology‐Based Study
Source: Hindawi journal article supplement (doi:10.1155/2020/8365603), 2020-01-01
Supplement: f1 [file 8365603.f1.zip]

| ID       | Description                                                | GeneRatio | BgRatio  |
|----------|------------------------------------------------------------|-----------|----------|
| hsa05167 | Kaposi sarcoma-associated herpesvirus infection            | 2020/5/7  | 186/7946 |
| hsa04210 | Apoptosis                                                  | 2020/4/7  | 136/7946 |
| hsa05162 | Measles                                                    | 2020/4/7  | 138/7946 |
| hsa05161 | Hepatitis B                                                | 2020/4/7  | 162/7946 |
| hsa05134 | Legionellosis                                              | 2020/3/7  | 57/7946  |
| hsa05130 | Pathogenic Escherichia coli infection                      | 2020/4/7  | 202/7946 |
| hsa05170 | Human immunodeficiency virus 1 infection                   | 2020/4/7  | 212/7946 |
| hsa05163 | Human cytomegalovirus infection                            | 2020/4/7  | 225/7946 |
| hsa05133 | Pertussis                                                  | 2020/3/7  | 76/7946  |
| hsa05210 | Colorectal cancer                                          | 2020/3/7  | 86/7946  |
| hsa05222 | Small cell lung cancer                                     | 2020/3/7  | 92/7946  |
| hsa04657 | IL-17 signaling pathway                                    | 2020/3/7  | 94/7946  |
| hsa04010 | MAPK signaling pathway                                     | 2020/4/7  | 295/7946 |
| hsa04933 | AGE-RAGE signaling pathway in diabetic complications       | 2020/3/7  | 100/7946 |
| hsa04668 | TNF signaling pathway                                      | 2020/3/7  | 112/7946 |
| hsa05145 | Toxoplasmosis                                              | 2020/3/7  | 112/7946 |
| hsa04380 | Osteoclast differentiation                                 | 2020/3/7  | 128/7946 |
| hsa04926 | Relaxin signaling pathway                                  | 2020/3/7  | 129/7946 |
| hsa05418 | Fluid shear stress and atherosclerosis                     | 2020/3/7  | 139/7946 |
| hsa04932 | Non-alcoholic fatty liver disease (NAFLD)                  | 2020/3/7  | 149/7946 |
| hsa05160 | Hepatitis C                                                | 2020/3/7  | 155/7946 |
| hsa05164 | Influenza A                                                | 2020/3/7  | 170/7946 |
| hsa04215 | Apoptosis - multiple species                               | 2020/2/7  | 32/7946  |
| hsa05152 | Tuberculosis                                               | 2020/3/7  | 180/7946 |
| hsa05016 | Huntington disease                                         | 2020/3/7  | 193/7946 |
| hsa05169 | Epstein-Barr virus infection                               | 2020/3/7  | 201/7946 |
| hsa05014 | Amyotrophic lateral sclerosis (ALS)                        | 2020/2/7  | 51/7946  |
| hsa05416 | Viral myocarditis                                          | 2020/2/7  | 60/7946  |
| hsa04917 | Prolactin signaling pathway                                | 2020/2/7  | 70/7946  |
| hsa05120 | Epithelial cell signaling in Helicobacter pylori infection | 2020/2/7  | 70/7946  |
| hsa04115 | p53 signaling pathway                                      | 2020/2/7  | 72/7946  |
| hsa01524 | Platinum drug resistance                                   | 2020/2/7  | 73/7946  |
| hsa05212 | Pancreatic cancer                                          | 2020/2/7  | 76/7946  |
| hsa05140 | Leishmaniasis                                              | 2020/2/7  | 77/7946  |
| hsa05132 | Salmonella infection                                       | 2020/2/7  | 80/7946  |
| hsa04662 | B cell receptor signaling pathway                          | 2020/2/7  | 82/7946  |
| hsa05165 | Human papillomavirus infection                             | 2020/3/7  | 330/7946 |
| hsa04211 | Longevity regulating pathway                               | 2020/2/7  | 89/7946  |
| hsa05235 | PD-L1 expression and PD-1 checkpoint pathway in cancer     | 2020/2/7  | 89/7946  |
| hsa04658 | Th1 and Th2 cell differentiation                           | 2020/2/7  | 92/7946  |
| hsa05323 | Rheumatoid arthritis                                       | 2020/2/7  | 93/7946  |
| hsa05142 | Chagas disease (American trypanosomiasis)                  | 2020/2/7  | 102/7946 |
| hsa05146 | Amoebiasis                                                 | 2020/2/7  | 102/7946 |
| hsa04620 | Toll-like receptor signaling pathway                       | 2020/2/7  | 104/7946 |
| hsa04660 | T cell receptor signaling pathway                          | 2020/2/7  | 104/7946 |
| hsa04659 | Th17 cell differentiation                                  | 2020/2/7  | 107/7946 |
| hsa04066 | HIF-1 signaling pathway                                    | 2020/2/7  | 109/7946 |
| hsa05135 | Yersinia infection                                         | 2020/2/7  | 120/7946 |
| hsa04915 | Estrogen signaling pathway                                 | 2020/2/7  | 138/7946 |
| hsa05012 | Parkinson disease                                          | 2020/2/7  | 142/7946 |
| hsa05224 | Breast cancer                                              | 2020/2/7  | 147/7946 |
| hsa05168 | Herpes simplex virus 1 infection                           | 2020/3/7  | 491/7946 |
| hsa05010 | Alzheimer disease                                          | 2020/2/7  | 171/7946 |
| hsa05202 | Transcriptional misregulation in cancer                    | 2020/2/7  | 186/7946 |
| hsa05203 | Viral carcinogenesis                                       | 2020/2/7  | 201/7946 |
| hsa05205 | Proteoglycans in cancer                                    | 2020/2/7  | 204/7946 |
| hsa04024 | cAMP signaling pathway                                     | 2020/2/7  | 216/7946 |

|          |                                         |          |          |
|----------|-----------------------------------------|----------|----------|
| hsa05166 | Human T-cell leukemia virus 1 infection | 2020/2/7 | 219/7946 |
| hsa04014 | Ras signaling pathway                   | 2020/2/7 | 232/7946 |
| hsa05131 | Shigellosis                             | 2020/2/7 | 236/7946 |
| hsa01523 | Antifolate resistance                   | 2020/1/7 | 31/7946  |
| hsa05206 | MicroRNAs in cancer                     | 2020/2/7 | 310/7946 |

---

| pvalue   | p.adjust | qvalue   | geneID                   | Count |
|----------|----------|----------|--------------------------|-------|
| 1.35E-07 | 1.39E-05 | 5.25E-06 | 2353/836/54205/5970/7422 | 5     |
| 2.76E-06 | 1.01E-04 | 3.80E-05 | 2353/836/54205/5970      | 4     |
| 2.93E-06 | 1.01E-04 | 3.80E-05 | 2353/836/54205/5970      | 4     |
| 5.56E-06 | 1.43E-04 | 5.41E-05 | 2353/836/54205/5970      | 4     |
| 1.20E-05 | 2.29E-04 | 8.68E-05 | 836/54205/5970           | 3     |
| 1.34E-05 | 2.29E-04 | 8.68E-05 | 2353/836/54205/5970      | 4     |
| 1.62E-05 | 2.38E-04 | 9.01E-05 | 2353/836/54205/5970      | 4     |
| 2.05E-05 | 2.64E-04 | 9.98E-05 | 836/54205/5970/7422      | 4     |
| 2.86E-05 | 3.28E-04 | 1.24E-04 | 2353/836/5970            | 3     |
| 4.15E-05 | 4.28E-04 | 1.62E-04 | 2353/836/54205           | 3     |
| 5.08E-05 | 4.65E-04 | 1.76E-04 | 836/54205/5970           | 3     |
| 5.42E-05 | 4.65E-04 | 1.76E-04 | 2353/836/5970            | 3     |
| 5.96E-05 | 4.72E-04 | 1.79E-04 | 2353/836/5970/7422       | 4     |
| 6.53E-05 | 4.80E-04 | 1.82E-04 | 836/5970/7422            | 3     |
| 9.16E-05 | 5.89E-04 | 2.23E-04 | 2353/836/5970            | 3     |
| 9.16E-05 | 5.89E-04 | 2.23E-04 | 836/54205/5970           | 3     |
| 1.36E-04 | 7.98E-04 | 3.02E-04 | 2353/5468/5970           | 3     |
| 1.40E-04 | 7.98E-04 | 3.02E-04 | 2353/5970/7422           | 3     |
| 1.74E-04 | 9.44E-04 | 3.57E-04 | 2353/5970/7422           | 3     |
| 2.14E-04 | 1.10E-03 | 4.17E-04 | 836/54205/5970           | 3     |
| 2.41E-04 | 1.18E-03 | 4.46E-04 | 836/54205/5970           | 3     |
| 3.16E-04 | 1.46E-03 | 5.52E-04 | 836/54205/5970           | 3     |
| 3.26E-04 | 1.46E-03 | 5.52E-04 | 836/54205                | 2     |
| 3.74E-04 | 1.61E-03 | 6.07E-04 | 836/54205/5970           | 3     |
| 4.59E-04 | 1.89E-03 | 7.16E-04 | 836/5468/54205           | 3     |
| 5.18E-04 | 2.05E-03 | 7.76E-04 | 836/54205/5970           | 3     |
| 8.31E-04 | 3.17E-03 | 1.20E-03 | 836/54205                | 2     |
| 1.15E-03 | 4.23E-03 | 1.60E-03 | 836/54205                | 2     |
| 1.56E-03 | 5.36E-03 | 2.03E-03 | 2353/5970                | 2     |
| 1.56E-03 | 5.36E-03 | 2.03E-03 | 836/5970                 | 2     |
| 1.65E-03 | 5.46E-03 | 2.07E-03 | 836/54205                | 2     |
| 1.70E-03 | 5.46E-03 | 2.07E-03 | 836/54205                | 2     |
| 1.84E-03 | 5.71E-03 | 2.16E-03 | 5970/7422                | 2     |
| 1.89E-03 | 5.71E-03 | 2.16E-03 | 2353/5970                | 2     |
| 2.03E-03 | 5.99E-03 | 2.26E-03 | 2353/5970                | 2     |
| 2.14E-03 | 6.11E-03 | 2.31E-03 | 2353/5970                | 2     |
| 2.19E-03 | 6.11E-03 | 2.31E-03 | 836/5970/7422            | 3     |
| 2.51E-03 | 6.63E-03 | 2.51E-03 | 5468/5970                | 2     |
| 2.51E-03 | 6.63E-03 | 2.51E-03 | 2353/5970                | 2     |
| 2.68E-03 | 6.88E-03 | 2.60E-03 | 2353/5970                | 2     |
| 2.74E-03 | 6.88E-03 | 2.60E-03 | 2353/7422                | 2     |
| 3.29E-03 | 7.81E-03 | 2.95E-03 | 2353/5970                | 2     |
| 3.29E-03 | 7.81E-03 | 2.95E-03 | 836/5970                 | 2     |
| 3.41E-03 | 7.81E-03 | 2.95E-03 | 2353/5970                | 2     |
| 3.41E-03 | 7.81E-03 | 2.95E-03 | 2353/5970                | 2     |
| 3.61E-03 | 8.08E-03 | 3.06E-03 | 2353/5970                | 2     |
| 3.74E-03 | 8.20E-03 | 3.10E-03 | 5970/7422                | 2     |
| 4.52E-03 | 9.70E-03 | 3.67E-03 | 2353/5970                | 2     |
| 5.94E-03 | 1.25E-02 | 4.72E-03 | 2353/5241                | 2     |
| 6.28E-03 | 1.29E-02 | 4.89E-03 | 836/54205                | 2     |
| 6.72E-03 | 1.35E-02 | 5.10E-03 | 2353/5241                | 2     |
| 6.80E-03 | 1.35E-02 | 5.10E-03 | 836/54205/5970           | 3     |
| 9.01E-03 | 1.75E-02 | 6.62E-03 | 836/54205                | 2     |
| 1.06E-02 | 2.02E-02 | 7.64E-03 | 5468/5970                | 2     |
| 1.23E-02 | 2.30E-02 | 8.71E-03 | 836/5970                 | 2     |
| 1.27E-02 | 2.33E-02 | 8.80E-03 | 836/7422                 | 2     |
| 1.41E-02 | 2.55E-02 | 9.64E-03 | 2353/5970                | 2     |

|          |          |          |            |   |
|----------|----------|----------|------------|---|
| 1.45E-02 | 2.57E-02 | 9.73E-03 | 2353/5970  | 2 |
| 1.62E-02 | 2.82E-02 | 1.07E-02 | 5970/7422  | 2 |
| 1.67E-02 | 2.87E-02 | 1.08E-02 | 54205/5970 | 2 |
| 2.70E-02 | 4.56E-02 | 1.72E-02 | 5970       | 1 |
| 2.80E-02 | 4.65E-02 | 1.76E-02 | 836/7422   | 2 |

---
