# Supplementary material for: Determining Pharmacological Mechanisms of Chinese Incompatible Herbs Fuzi and Banxia in Chronic Obstructive Pulmonary Disease: A Systems Pharmacology‐Based Study
Source: Hindawi journal article supplement (doi:10.1155/2020/8365603), 2020-01-01
Supplement: f1 [file 8365603.f1.zip]

| ID         | Description                                                                          |
|------------|--------------------------------------------------------------------------------------|
| GO:0033613 | activating transcription factor binding                                              |
| GO:0046982 | protein heterodimerization activity                                                  |
| GO:0042805 | actinin binding                                                                      |
| GO:0004879 | nuclear receptor activity                                                            |
| GO:0098531 | transcription factor activity, direct ligand regulated sequence-specific DNA binding |
| GO:0003707 | steroid hormone receptor activity                                                    |
| GO:0001228 | DNA-binding transcription activator activity, RNA polymerase II-specific             |
| GO:0000978 | RNA polymerase II proximal promoter sequence-specific DNA binding                    |
| GO:0003682 | chromatin binding                                                                    |
| GO:0000987 | proximal promoter sequence-specific DNA binding                                      |
| GO:0005126 | cytokine receptor binding                                                            |
| GO:0005172 | vascular endothelial growth factor receptor binding                                  |
| GO:0016004 | phospholipase activator activity                                                     |
| GO:0004861 | cyclin-dependent protein serine/threonine kinase inhibitor activity                  |
| GO:0004953 | icosanoid receptor activity                                                          |
| GO:0042301 | phosphate ion binding                                                                |
| GO:0060229 | lipase activator activity                                                            |
| GO:0005161 | platelet-derived growth factor receptor binding                                      |
| GO:0036041 | long-chain fatty acid binding                                                        |
| GO:0046965 | retinoid X receptor binding                                                          |
| GO:0005123 | death receptor binding                                                               |
| GO:0016538 | cyclin-dependent protein serine/threonine kinase regulator activity                  |
| GO:0004190 | aspartic-type endopeptidase activity                                                 |
| GO:0000979 | RNA polymerase II core promoter sequence-specific DNA binding                        |
| GO:0001223 | transcription coactivator binding                                                    |
| GO:0051393 | alpha-actinin binding                                                                |
| GO:0070001 | aspartic-type peptidase activity                                                     |
| GO:0070412 | R-SMAD binding                                                                       |
| GO:1901567 | fatty acid derivative binding                                                        |
| GO:0001968 | fibronectin binding                                                                  |
| GO:0042974 | retinoic acid receptor binding                                                       |
| GO:0005504 | fatty acid binding                                                                   |
| GO:0042056 | chemoattractant activity                                                             |
| GO:0051059 | NF-kappaB binding                                                                    |
| GO:0030291 | protein serine/threonine kinase inhibitor activity                                   |
| GO:0001046 | core promoter sequence-specific DNA binding                                          |
| GO:0001102 | RNA polymerase II activating transcription factor binding                            |
| GO:0001221 | transcription cofactor binding                                                       |
| GO:0030331 | estrogen receptor binding                                                            |
| GO:0001047 | core promoter binding                                                                |
| GO:0050840 | extracellular matrix binding                                                         |
| GO:0030374 | nuclear receptor transcription coactivator activity                                  |
| GO:0032813 | tumor necrosis factor receptor superfamily binding                                   |
| GO:0004722 | protein serine/threonine phosphatase activity                                        |
| GO:0070888 | E-box binding                                                                        |
| GO:0004197 | cysteine-type endopeptidase activity                                                 |
| GO:0043621 | protein self-association                                                             |
| GO:0033293 | monocarboxylic acid binding                                                          |
| GO:0070491 | repressing transcription factor binding                                              |
| GO:0004860 | protein kinase inhibitor activity                                                    |

| GeneRatio | BgRatio   | pvalue   | p.adjust | qvalue   | geneID              | Count |
|-----------|-----------|----------|----------|----------|---------------------|-------|
| 2020/3/7  | 64/16969  | 1.77E-06 | 1.74E-04 | 5.78E-05 | 2353/5468/5970      | 3     |
| 2020/4/7  | 497/16969 | 2.37E-05 | 1.16E-03 | 3.87E-04 | 2353/5468/5970/7422 | 4     |
| 2020/2/7  | 29/16969  | 5.89E-05 | 1.92E-03 | 6.41E-04 | 5468/5970           | 2     |
| 2020/2/7  | 46/16969  | 1.50E-04 | 2.93E-03 | 9.77E-04 | 5468/5241           | 2     |
| 2020/2/7  | 46/16969  | 1.50E-04 | 2.93E-03 | 9.77E-04 | 5468/5241           | 2     |
| 2020/2/7  | 54/16969  | 2.07E-04 | 3.37E-03 | 1.12E-03 | 5468/5241           | 2     |
| 2020/3/7  | 390/16969 | 3.94E-04 | 5.51E-03 | 1.84E-03 | 2353/5970/5241      | 3     |
| 2020/3/7  | 432/16969 | 5.31E-04 | 5.95E-03 | 1.98E-03 | 5468/5970/5241      | 3     |
| 2020/3/7  | 437/16969 | 5.50E-04 | 5.95E-03 | 1.98E-03 | 2353/5468/5970      | 3     |
| 2020/3/7  | 452/16969 | 6.07E-04 | 5.95E-03 | 1.98E-03 | 5468/5970/5241      | 3     |
| 2020/2/7  | 210/16969 | 3.07E-03 | 2.74E-02 | 9.12E-03 | 836/7422            | 2     |
| 2020/1/7  | 11/16969  | 4.53E-03 | 2.97E-02 | 9.90E-03 | 7422                | 1     |
| 2020/1/7  | 11/16969  | 4.53E-03 | 2.97E-02 | 9.90E-03 | 836                 | 1     |
| 2020/1/7  | 12/16969  | 4.94E-03 | 2.97E-02 | 9.90E-03 | 836                 | 1     |
| 2020/1/7  | 12/16969  | 4.94E-03 | 2.97E-02 | 9.90E-03 | 5468                | 1     |
| 2020/1/7  | 12/16969  | 4.94E-03 | 2.97E-02 | 9.90E-03 | 5970                | 1     |
| 2020/1/7  | 13/16969  | 5.35E-03 | 2.97E-02 | 9.90E-03 | 836                 | 1     |
| 2020/1/7  | 14/16969  | 5.76E-03 | 2.97E-02 | 9.90E-03 | 7422                | 1     |
| 2020/1/7  | 14/16969  | 5.76E-03 | 2.97E-02 | 9.90E-03 | 5468                | 1     |
| 2020/1/7  | 15/16969  | 6.17E-03 | 3.02E-02 | 1.01E-02 | 5468                | 1     |
| 2020/1/7  | 17/16969  | 6.99E-03 | 3.12E-02 | 1.04E-02 | 836                 | 1     |
| 2020/1/7  | 18/16969  | 7.40E-03 | 3.12E-02 | 1.04E-02 | 836                 | 1     |
| 2020/1/7  | 20/16969  | 8.22E-03 | 3.12E-02 | 1.04E-02 | 836                 | 1     |
| 2020/1/7  | 21/16969  | 8.63E-03 | 3.12E-02 | 1.04E-02 | 2353                | 1     |
| 2020/1/7  | 21/16969  | 8.63E-03 | 3.12E-02 | 1.04E-02 | 5970                | 1     |
| 2020/1/7  | 21/16969  | 8.63E-03 | 3.12E-02 | 1.04E-02 | 5468                | 1     |
| 2020/1/7  | 22/16969  | 9.04E-03 | 3.12E-02 | 1.04E-02 | 836                 | 1     |
| 2020/1/7  | 23/16969  | 9.45E-03 | 3.12E-02 | 1.04E-02 | 2353                | 1     |
| 2020/1/7  | 23/16969  | 9.45E-03 | 3.12E-02 | 1.04E-02 | 5468                | 1     |
| 2020/1/7  | 24/16969  | 9.86E-03 | 3.12E-02 | 1.04E-02 | 7422                | 1     |
| 2020/1/7  | 24/16969  | 9.86E-03 | 3.12E-02 | 1.04E-02 | 5468                | 1     |
| 2020/1/7  | 28/16969  | 1.15E-02 | 3.43E-02 | 1.14E-02 | 5468                | 1     |
| 2020/1/7  | 29/16969  | 1.19E-02 | 3.43E-02 | 1.14E-02 | 7422                | 1     |
| 2020/1/7  | 29/16969  | 1.19E-02 | 3.43E-02 | 1.14E-02 | 5970                | 1     |
| 2020/1/7  | 30/16969  | 1.23E-02 | 3.45E-02 | 1.15E-02 | 836                 | 1     |
| 2020/1/7  | 32/16969  | 1.31E-02 | 3.57E-02 | 1.19E-02 | 2353                | 1     |
| 2020/1/7  | 37/16969  | 1.52E-02 | 4.02E-02 | 1.34E-02 | 2353                | 1     |
| 2020/1/7  | 38/16969  | 1.56E-02 | 4.02E-02 | 1.34E-02 | 5970                | 1     |
| 2020/1/7  | 41/16969  | 1.68E-02 | 4.20E-02 | 1.40E-02 | 5468                | 1     |
| 2020/1/7  | 42/16969  | 1.72E-02 | 4.20E-02 | 1.40E-02 | 2353                | 1     |
| 2020/1/7  | 43/16969  | 1.76E-02 | 4.20E-02 | 1.40E-02 | 7422                | 1     |
| 2020/1/7  | 45/16969  | 1.84E-02 | 4.20E-02 | 1.40E-02 | 5468                | 1     |
| 2020/1/7  | 45/16969  | 1.84E-02 | 4.20E-02 | 1.40E-02 | 836                 | 1     |
| 2020/1/7  | 49/16969  | 2.00E-02 | 4.36E-02 | 1.45E-02 | 54205               | 1     |
| 2020/1/7  | 49/16969  | 2.00E-02 | 4.36E-02 | 1.45E-02 | 5468                | 1     |
| 2020/1/7  | 56/16969  | 2.29E-02 | 4.77E-02 | 1.59E-02 | 836                 | 1     |
| 2020/1/7  | 56/16969  | 2.29E-02 | 4.77E-02 | 1.59E-02 | 5468                | 1     |
| 2020/1/7  | 59/16969  | 2.41E-02 | 4.80E-02 | 1.60E-02 | 5468                | 1     |
| 2020/1/7  | 59/16969  | 2.41E-02 | 4.80E-02 | 1.60E-02 | 5970                | 1     |
| 2020/1/7  | 60/16969  | 2.45E-02 | 4.80E-02 | 1.60E-02 | 836                 | 1     |
