# Supplementary material for: Determining Pharmacological Mechanisms of Chinese Incompatible Herbs Fuzi and Banxia in Chronic Obstructive Pulmonary Disease: A Systems Pharmacology-Based Study
Source: Evid Based Complement Alternat Med. 2020 Dec 31;2020:8365603. doi: 10.1155/2020/8365603 (PMC7790578; doi:10.1155/2020/8365603)
Supplement: Supplementary Materials — Supplementary Table 1. Gene targets of Fuzi. Supplementary Table 2. Gene targets of Banxia. Supplementary Table 3. Number of targets corresponding to different components. Supplementary Table 4. The data of GO enrichment analysis. Supplementary Table 5. The data of KEGG enrichment analysis. [file 8365603.f1.zip]

Archive with 3 entries (3 files):
- 8365603.f1/GO..pdf
- 8365603.f1/KEGG..pdf
- 8365603.f1/Supplementary_Material_Table_1-5.pdf
